# Supplementary material for: Flowback verses first-flush: new information on the geochemistry of produced water from mandatory reporting
Source: Royal Society of Chemistry journal article supplement (doi:10.1039/c8em00351c), 2018-12-06
Supplement: c8em00351c1.pdf [file c8em00351c1.pdf]

SUPPLEMENTARY MATERIALS

**Flowback versus First-Flush:  
New Information on the Geochemistry of Produced Water from  
Mandatory Reporting**

By

William T. Stringfellow<sup>a,b</sup> and Mary Kay Camarillo<sup>a,b,\*</sup>

<sup>a</sup>Ecological Engineering Research Program, School of Engineering & Computer Science,  
University of the Pacific, 3601 Pacific Avenue, Stockton, CA 95211, USA.

<sup>b</sup>Earth & Environmental Sciences Area, Lawrence Berkeley National Laboratory,  
1 Cyclotron Road, Berkeley, CA 94720, USA.

\*Corresponding author. Email: [wstringfellow@lbl.gov](mailto:wstringfellow@lbl.gov) Phone: +1-510-486-7903

**Prepared for submission to:**

**Environmental Science: Processes & Impacts**

**October 2018**

Table S-1. Chemical constituents used in well stimulations in California, May 5, 2015 – June 29, 2016, sorted by frequency of use in well stimulations. There were 618 stimulations conducted at 596 wells. The number of unique constituents is 178. TT= used as a tracer (chemical was used in a treatment where tracers were used), AF=used in acid fracturing, MA=used in matrix acidizing.

| <b>Chemical name</b>                                | <b>CASRN</b> | <b>Stimu-<br/>lations</b> |
|-----------------------------------------------------|--------------|---------------------------|
| Water                                               | 7732-18-5    | 618                       |
| Crystalline silica (quartz)                         | 14808-60-7   | 617                       |
| Guar gum                                            | 9000-30-0    | 617                       |
| Ammonium persulfate                                 | 7727-54-0    | 577                       |
| 2-Butoxypropan-1-ol                                 | 15821-83-7   | 522                       |
| 1-Butoxy-2-propanol                                 | 5131-66-8    | 522                       |
| Prolonium chloride                                  | 55636-09-4   | 522 (AF)                  |
| Paraffinic petroleum distillate, hydrotreated light | 64742-55-8   | 522                       |
| Isotridecanol, ethoxylated                          | 9043-30-5    | 522                       |
| Magnesium nitrate                                   | 10377-60-3   | 521                       |
| Crystalline silica (cristobalite)                   | 14464-46-1   | 521                       |
| 5-Chloro-2-methyl-3(2H)-isothiazolone               | 26172-55-4   | 521                       |
| 2-Methyl-3(2H)-isothiazolone                        | 2682-20-4    | 521                       |
| Hydrotreated light petroleum distillate             | 64742-47-8   | 521                       |
| Magnesium chloride                                  | 7786-30-3    | 521                       |
| Diatomaceous earth, calcined                        | 91053-39-3   | 521                       |
| Sodium hydroxide                                    | 1310-73-2    | 519                       |
| Sodium tetraborate decahydrate                      | 1303-96-4    | 493                       |
| Ethylene glycol                                     | 107-21-1     | 447                       |
| Phosphonic acid                                     | 13598-36-2   | 411                       |
| Nitrilotris (methylene phosphonic acid)             | 6419-19-8    | 410                       |
| Hemicellulase enzyme concentrate                    | 9025-56-3    | 288                       |
| Glycerol                                            | 56-81-5      | 287                       |
| Sodium chloride                                     | 7647-14-5    | 276                       |
| Beta mannanases                                     | 37288-54-3   | 233                       |
| Methanol                                            | 67-56-1      | 84                        |
| Boric acid                                          | 10043-35-3   | 79                        |
| Methyl borate                                       | 121-43-7     | 79                        |
| Potassium bicarbonate                               | 298-14-6     | 79                        |
| Potassium carbonate                                 | 584-08-7     | 79                        |
| Hemicellulase enzyme                                | 9012-54-8    | 61                        |
| Non-crystalline silica (impurity)                   | 7631-86-9    | 55                        |
| Isopropanol                                         | 67-63-0      | 53                        |
| Calcium magnesium sodium phosphate frit             | 65997-18-4   | 49                        |
| Choline chloride                                    | 67-48-1      | 49                        |
| Tetrakis hydroxymethyl phosphonium sulfate          | 55566-30-8   | 46                        |
| 1,2-benzisothiazolin-3-one                          | 2634-33-5    | 42                        |

| <b>Chemical name</b>                                                                                              | <b>CASRN</b> | <b>Stimulations</b> |
|-------------------------------------------------------------------------------------------------------------------|--------------|---------------------|
| Sodium polyacrylate                                                                                               | 9003-04-7    | 41                  |
| Ammonium chloride                                                                                                 | 12125-02-9   | 40                  |
| Sodium sulfate                                                                                                    | 7757-82-6    | 40                  |
| Sodium persulfate                                                                                                 | 7775-27-1    | 40                  |
| Monoethanolamine borate                                                                                           | 26038-87-9   | 39                  |
| Polydimethyl diallyl ammonium chloride                                                                            | 26062-79-3   | 39                  |
| Lactose                                                                                                           | 63-42-3      | 39                  |
| Sodium bisulfite                                                                                                  | 7631-90-5    | 39                  |
| Acetic acid                                                                                                       | 64-19-7      | 34                  |
| Triethanolamine                                                                                                   | 102-71-6     | 31                  |
| Zinc sulfate                                                                                                      | 7733-02-0    | 28                  |
| Xanthan gum                                                                                                       | 11138-66-2   | 22                  |
| Propylene glycol                                                                                                  | 57-55-6      | 22                  |
| Sodium citrate                                                                                                    | 68-04-2      | 22                  |
| Triethylene glycol                                                                                                | 112-27-6     | 21 (AF)             |
| Castor oil, ethoxylated                                                                                           | 61791-12-6   | 21 (AF)             |
| Alcohols, C12-15 ethoxylated                                                                                      | 68131-39-5   | 21 (AF)             |
| 1,2-Ethanediamine, N1-(2-aminoethyl)-N2-(2-((2-aminoethyl)amino)ethyl)-, polymer with 2-methyloxirane and oxirane | 68815-65-6   | 21 (AF)             |
| Poly(oxy-1,2-ethanediyl), .alpha.-2,4,6-tris(1-phenylethyl)phenyl-.omega.-hydroxy-                                | 70559-25-0   | 21 (AF)             |
| Sorbitan stearate                                                                                                 | 1338-41-6    | 20                  |
| 2-Propenoic acid, 2-ethylhexyl ester, polymer with 2-hydroxyethyl 2-propenoate                                    | 36089-45-9   | 20                  |
| Tetrahydro-3,5-dimethyl-1,3,5-thiadiazine-2-thione                                                                | 533-74-4     | 20                  |
| Dimethyl siloxanes and silicones                                                                                  | 63148-62-9   | 20                  |
| Siloxanes and silicones, dimethyl, reaction products with silica                                                  | 67762-90-7   | 20                  |
| Fatty acids, C18-unsatd., dimers, ethoxylated propoxylated                                                        | 68308-89-4   | 20                  |
| Siloxanes and Silicones, di-Me, 3-hydroxypropyl Me, ethoxylated propoxylated                                      | 68937-55-3   | 20                  |
| Sodium nitrite                                                                                                    | 7632-00-0    | 20                  |
| Sodium carboxymethylcellulose                                                                                     | 9004-32-4    | 20                  |
| Sorbitan monooleate, ethoxylated                                                                                  | 9005-65-6    | 20                  |
| Citrus terpenes                                                                                                   | 94266-47-4   | 19                  |
| Potassium chloride                                                                                                | 7447-40-7    | 15                  |
| Polypropylene glycol                                                                                              | 25322-69-4   | 9                   |
| Citric acid                                                                                                       | 77-92-9      | 9                   |
| Glutaraldehyde                                                                                                    | 111-30-8     | 8                   |
| MBNPA (2-bromo-3-nitrilopropionamide)                                                                             | 1113-55-9    | 8                   |
| D-limonene                                                                                                        | 5989-27-5    | 8                   |
| 2,2 Dibromo-3-nitrilopropionamide                                                                                 | 10222-01-2   | 7                   |
| Lauryl hydroxysultaine                                                                                            | 13197-76-7   | 7                   |

| <b>Chemical name</b>                                           | <b>CASRN</b> | <b>Stimulations</b> |
|----------------------------------------------------------------|--------------|---------------------|
| Acetic acid ethenyl ester, polymer with ethene                 | 24937-78-8   | 5                   |
| Diatomaceous earth, natural (kieselguhr)                       | 61790-53-2   | 5                   |
| Heavy aromatic naphtha                                         | 64742-94-5   | 5                   |
| Olefin/maleic ester                                            | 68188-50-1   | 5                   |
| Mineral oil                                                    | 8042-47-5    | 5                   |
| Naphthalene                                                    | 91-20-3      | 5                   |
| 1,2,4-Trimethylbenzene                                         | 95-63-6      | 5                   |
| Acrylonitrile                                                  | 107-13-1     | 4                   |
| Potassium acetate                                              | 127-08-2     | 4                   |
| Potassium hydroxide                                            | 1310-58-3    | 4                   |
| Potassium borate                                               | 1332-77-0    | 4                   |
| 4-Chlorobenzophenone                                           | 134-85-0     | 4 (TT)              |
| Magnesium silicate hydrate (talc)                              | 14807-96-6   | 4                   |
| Vinylidene chloride/methylacrylate copolymer                   | 25038-72-6   | 4                   |
| Polyethylene glycol monohexyl ether                            | 31726-34-8   | 4                   |
| Polytetrafluoroethylene                                        | 9002-84-0    | 4                   |
| 2-propenoic acid, polymer with 2-propenamide                   | 9003-06-9    | 4                   |
| 1,4-Dibromobenzene                                             | 106-37-6     | 3 (TT)              |
| 1-bromo-3,5-dichlorobenzene                                    | 19752-55-7   | 3 (TT)              |
| Poly(dimethylaminoethylmethylacrylate) dimethyl sulphate quat. | 27103-90-8   | 3                   |
| 2,5-Dibromothiophene                                           | 3141-27-3    | 3 (TT)              |
| 1-Bromo-4-iodobenzene                                          | 589-87-7     | 3 (TT)              |
| Dicoco dimethyl quaternary ammonium chloride                   | 61789-77-3   | 3                   |
| 4-Iodotoluene                                                  | 624-31-7     | 3 (TT)              |
| 1,3,5-Tribromobenzene                                          | 626-39-1     | 3 (TT)              |
| 2,4,6-Tribromotoluene                                          | 6320-40-7    | 3 (TT)              |
| 1,2,4,5-Tetrabromobenzene                                      | 636-28-2     | 3 (TT)              |
| 1-Chloro-4-iodobenzene                                         | 637-87-6     | 3 (TT)              |
| Orange terpenes                                                | 68647-72-3   | 3 (AF)              |
| Ethoxylated alcohol C11-14                                     | 78330-21-9   | 3                   |
| Phenolic resin                                                 | 9003-35-4    | 3                   |
| 1-Iodonaphthalene                                              | 90-14-2      | 3 (TT)              |
| 2-Ethylhexan-1-ol                                              | 104-76-7     | 2                   |
| Ethoxylated alcohol C6                                         | 104780-82-7  | 2                   |
| 2-Butoxyethanol                                                | 111-76-2     | 2                   |
| Disodium octaborate tetrahydrate                               | 12008-41-2   | 2                   |
| Corundum                                                       | 1302-74-5    | 2                   |
| Ulexite                                                        | 1319-33-1    | 2                   |
| Mullite                                                        | 1327-36-2    | 2                   |
| 3,5-Dibromotoluene                                             | 1611-92-3    | 2 (TT)              |
| 2,4,5-Tribromotoluene                                          | 3278-88-4    | 2 (TT)              |
| 1,2-Diiodobenzene                                              | 615-42-9     | 2 (TT)              |

| <b>Chemical name</b>                               | <b>CASRN</b> | <b>Stimulations</b> |
|----------------------------------------------------|--------------|---------------------|
| Hydrochloric acid                                  | 7647-01-0    | 2                   |
| Hydrofluoric acid                                  | 7664-39-3    | 2                   |
| Zirconium dichloride oxide                         | 7699-43-6    | 2                   |
| Ethoxylated alcohol C7-9-iso, C8                   | 78330-19-5   | 2                   |
| Polyethylene, polypropylene ether glycol copolymer | 9003-11-6    | 2                   |
| Calcium chloride                                   | 10043-52-4   | 1                   |
| Quaternary ammonium compound                       | 100765-57-9  | 1 (AF)              |
| Cinnamaldehyde                                     | 104-55-2     | 1 (AF)              |
| Propargyl alcohol                                  | 107-19-7     | 1                   |
| 1-Methoxy-2-propanol                               | 107-98-2     | 1                   |
| Methyl isobutyl ketone                             | 108-10-1     | 1 (AF)              |
| Diethanolamine                                     | 111-42-2     | 1                   |
| 2,2"-oxydiethanol (impurity)                       | 111-46-6     | 1                   |
| 1-Tetradecene                                      | 1120-36-1    | 1                   |
| Oleic acid                                         | 112-80-1     | 1                   |
| 1-Octadecene                                       | 112-88-9     | 1                   |
| Ammonium fluoride                                  | 12125-01-8   | 1                   |
| 2-Propenoic acid, polymer with sodium phosphinate  | 129898-01-7  | 1                   |
| Ammonium bifluoride                                | 1341-49-7    | 1                   |
| Potassium oleate                                   | 143-18-0     | 1                   |
| 2-Iodobiphenyl                                     | 2113-51-1    | 1 (TT)              |
| 5-Iodo-m-xylene                                    | 22445-41-6   | 1 (TT)              |
| Polyethylene oxide                                 | 25322-68-3   | 1                   |
| Dodecylbenzene sulfonic acid                       | 27176-87-0   | 1                   |
| Etidronic acid                                     | 2809-21-4    | 1                   |
| 4-Iodo-o-xylene                                    | 31599-61-8   | 1 (TT)              |
| 1-Eicosene                                         | 3452-07-1    | 1                   |
| Aziridine, polymer with methyloxirane and oxirane  | 52501-07-2   | 1 (AF)              |
| Hydroxylamine hydrochloride                        | 5470-11-1    | 1 (MA)              |
| Polyurethane resin                                 | 57029-46-6   | 1                   |
| 9-Bromophenanthrene                                | 573-17-1     | 1 (TT)              |
| Diethyl sulfosuccinate sodium salt                 | 577-11-7     | 1                   |
| 2-Bromonaphthalene                                 | 580-13-2     | 1 (TT)              |
| 3-aminopropyl (sileanetriol)                       | 58160-99-9   | 1                   |
| Fatty acids, tall-oil                              | 61790-12-3   | 1                   |
| Amines, hydrogenated tallow alkyl, acetates        | 61790-59-8   | 1                   |
| Fatty acids, tall-oil, ethoxylated                 | 61791-00-2   | 1 (AF)              |
| 1-Hexadecene                                       | 629-73-2     | 1                   |
| Ethanol                                            | 64-17-5      | 1                   |
| Formic acid                                        | 64-18-6      | 1                   |
| Benzoic acid                                       | 65-85-0      | 1 (AF)              |
| Alcohols, C10-14, ethoxylated                      | 66455-15-0   | 1                   |
| Sulferized polyolefin                              | 68037-13-8   | 1 (AF)              |

| <b>Chemical name</b>                                                                                      | <b>CASRN</b> | <b>Stimulations</b> |
|-----------------------------------------------------------------------------------------------------------|--------------|---------------------|
| Phenol, 4,4'-(1-methylethylidene) bis-, polymer with 2-(chloromethyl)oxirane, 2-methyloxirane and oxirane | 68123-18-2   | 1                   |
| Silanetrio; (3-aminopropyl, homopolymer                                                                   | 68400-07-7   | 1                   |
| Ethoxylated alcohol C6-12                                                                                 | 68439-45-2   | 1                   |
| Thiourea, polymer with formaldehyde and 1-phenylethanone                                                  | 68527-49-1   | 1                   |
| Alcohols, C12-16, ethoxylated                                                                             | 68551-12-2   | 1                   |
| Ethoxylated alcohol C8-10                                                                                 | 68603-25-8   | 1 (AF)              |
| Alcohols, C14-C15, ethoxylated                                                                            | 68951-67-7   | 1                   |
| 2,4-Dibromomesitylene                                                                                     | 6942-99-0    | 1 (TT)              |
| Tar bases, quinoline derivs., benzyl chloride quaternized                                                 | 72480-70-7   | 1 (AF)              |
| Copper dichloride                                                                                         | 7447-39-4    | 1 (MA)              |
| Ethylene oxide                                                                                            | 75-21-8      | 1                   |
| Sulfuric acid                                                                                             | 7664-93-9    | 1                   |
| Potassium iodide                                                                                          | 7681-11-0    | 1                   |
| Triisobutylene (mixed isomers)                                                                            | 7756-94-7    | 1 (AF)              |
| Tricalcium phosphate                                                                                      | 7758-87-4    | 1                   |
| Polyethylene glycol trimethyl nonyl ether                                                                 | 84133-50-6   | 1                   |
| Erythorbic acid                                                                                           | 89-65-6      | 1                   |
